# Supplementary material for: COVID-19 and smoking: is nicotine the hidden link?
Source: PubMed Central journal article supplement — Eur Respir J. 2020 Jun 4;55(6):2001116. doi: 10.1183/13993003.01116-2020 (PMC7236819; doi:10.1183/13993003.01116-2020), 2020-06-04
Supplement: ERJ-01116-2020.Shareable.pdf [file ERJ-01116-2020.Shareable.pdf]

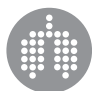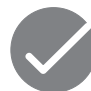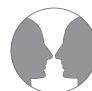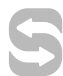

SHAREABLE PDF

# COVID-19 and smoking: is nicotine the hidden link?

Patrizia Russo<sup>1,2</sup>, Stefano Bonassi<sup>1,2</sup>, Robertina Giacconi<sup>3</sup>, Marco Malavolta<sup>3</sup>, Carlo Tomino<sup>4</sup> and Fabrizio Maggi<sup>5,6</sup>

**Affiliations:** <sup>1</sup>Clinical and Molecular Epidemiology, IRCSS San Raffaele Pisana, Rome, Italy. <sup>2</sup>Dept of Human Sciences and Quality of Life Promotion, San Raffaele University, Rome, Italy. <sup>3</sup>Advanced Technology Center for Aging Research, Scientific Technological Area, Italian National Institute of Health and Science on Aging (INRCA), Ancona, Italy. <sup>4</sup>Scientific Direction, IRCSS San Raffaele Pisana, Rome, Italy. <sup>5</sup>Dept of Translational Research, University of Pisa, Pisa, Italy. <sup>6</sup>Virology Division, Pisa University Hospital, Pisa, Italy.

**Correspondence:** Patrizia Russo, Clinical and Molecular Epidemiology, IRCSS San Raffaele Pisana, Via di Val Cannuta, 247, I-00166 Rome, Italy. E-mail: patrizia\_russo@hotmail.it

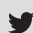

@ERSpublications

**Nicotine via alpha7-nicotinic receptor induces ACE-2 overexpression in human bronchial epithelial cells (HBEPc)** <https://bit.ly/3eJ5b35>

**Cite this article as:** Russo P, Bonassi S, Giacconi R, *et al.* COVID-19 and smoking: is nicotine the hidden link?. *Eur Respir J* 2020; 55: 2001116 [<https://doi.org/10.1183/13993003.01116-2020>].

This single-page version can be shared freely online.

## To the Editor:

LEUNG *et al.* [1] have recently published, in the *European Respiratory Journal*, a paper on the expression of angiotensin-converting enzyme II (ACE-2) in the small airway epithelia of smokers and COPD patients, discussing its effects on the risk of severe coronavirus disease 2019 (COVID-19). The authors found an increased expression of the ACE-2 gene in the airways of subjects with COPD and in current smokers. Indeed, a recent systematic review reporting data on the smoking habits of patients infected with severe acute respiratory syndrome coronavirus 2 (SARS-CoV-2), concluded that smoking may be associated with a negative progression of the disease and with the adverse outcome [2]. These conclusions were challenged in a correspondence by Cai [3] on the basis that a reliable mechanism explaining this association was missing. The need for these results to be supported by additional studies is quite clear, but we believe that a robust mechanistic explanation exists. Nicotine has a known influence on the homeostasis of the renin-angiotensin system (RAS) up-regulating the angiotensin-converting enzyme (ACE)/angiotensin (ANG)-II/ANG II type 1 receptor axis, and down-regulating the compensatory ACE-2/ANG-(1-7)/Mas receptor axis, contributing in turn to the development of cardiovascular and pulmonary diseases [4]. Different airway cells, such as bronchial epithelial cells, type II alveolar epithelial cells and interstitial lung fibroblasts, express nicotinic acetylcholine receptors (nAChR), specifically the  $\alpha 7$  subtype [5]. All these cells express components of the RAS [4]. In addition, nicotine increases the expression and/or activity of ACE in the lung [4], an increase which has been found also in the serum of smokers, and that required at least 20 min to return to control level [4]. ACE-2 serves as a physiologically relevant cellular entry receptor for SARS-CoV, for the human respiratory coronavirus NL63, and probably for SARS-CoV-2 [6]. ACE binds the SARS-CoV-2 S protein, and through its tissutal expression mediates the localisation and the efficiency of the infection [6]. Moreover, nicotine induces the epithelial-mesenchymal transition (EMT) [5, 7], a mechanism sufficient to allow “normal” differentiated cells to acquire the stem cell-like characteristics and properties. We planned experiments on human bronchial epithelial cells (HBEPc), obtained from Cell Applications Inc. ([www.cellapplications.com/product number 502K-05a](http://www.cellapplications.com/product_number_502K-05a)). Cells were maintained as

adherent monolayer in complete bronchial/tracheal epithelial cell growth medium (www.cellapplications.com/product) at 37°C in 95% air/5% CO<sub>2</sub>, seeded at an initial density of  $7.5 \times 10^4$  cells·cm<sup>-2</sup>, and sub-cultured with a 0.25% trypsin–1 mM EDTA solution (Sigma-Aldrich, Milan, Italy) when cultures reached 80% confluence. HBEpC are derived from the surface epithelium of normal human bronchi non-diseased (*i.e.* asthma, COPD or type 2 diabetes). The morphology is consistent with epithelial origin, and is positive for epithelial cell marker cytokeratin 18. Semi-confluent HBEpC at fourth passage ( $7.5 \times 10^4$  cells·cm<sup>-2</sup>) were treated: 1) for 1 h with zero or  $1.0 \times 10^{-7}$  M nicotine (Sigma-Aldrich, Milan, Italy) dissolved in saline in complete medium; 2) with  $1.0 \times 10^{-6}$  M  $\alpha$ -Bungarotoxin ( $\alpha$ -BTX; Sigma-Aldrich, Milan, Italy) dissolved in saline, in the continued presence of nicotine at zero or  $1.0 \times 10^{-7}$  M for 1 h; 3) treated continuously with nicotine for additional passages, 1 passage every 48 h for a total of 16 passages. We showed, for the first time, that nicotine at  $1 \times 10^{-7}$  M (the concentration present on the alveolar lining fluids after one cigarette is in the range  $6 \times 10^{-6}$  to  $6 \times 10^{-5}$  M [5]) is able to increase ACE-2 (figure 1a) in HBEpC. Treatment with nicotine induces phospho-S6 ribosomal protein (Ser235/236), Akt1, phospho-Akt (Ser473), phospho-Akt (Thr308) and phospho-p44/42 MAPK (Thr202/Tyr204) (figure 1b). To verify the hypothesis that ACE-2 is induced by nicotine through  $\alpha 7$ -nAChR, HBEpC, at fourth passage, in the exponential growth phase, plated at a density of  $1 \times 10^6$  cells·mL<sup>-1</sup>, were incubated with  $\alpha 7$ -nAChR siRNA (0.1  $\mu$ g) diluted in 100  $\mu$ L of siRNA transfection medium. Transfection was performed as described by Li *et al.* [8], who transfected, successfully, HBE16 human airway epithelial cell line (unaffected cells). A clone of transfected HBEpC that did not express  $\alpha 7$ -nAChR proteins, also after treatment with nicotine (figure 1c), and is not able to induce phospho-S6 ribosomal protein (Ser235/236), Akt1, phospho-Akt (Ser473), phospho-Akt (Thr308) and phospho-p44/42 MAPK (Thr202/Tyr204) after nicotine treatment (figure 1d), was selected for further experiments. Nicotine did not induce ACE-2 in this clone (si-mRNA- $\alpha 7$ -HBEpC) (figure 1a). This observation supports the hypothesis that ACE-2 increase is specifically mediated by  $\alpha 7$ -nAChR. Moreover, when HBEpC were incubated simultaneously with nicotine and  $\alpha$ -BTX, an  $\alpha 7$  nicotine antagonist [9], no induction of ACE-2 was observed (figure 1d). Importantly, treatment with nicotine,  $\alpha$ -BTX or with the combination is not cytotoxic (data not shown). On these bases, we suggest that smoking may promote cellular uptake mechanisms of SARS-CoV-2 through  $\alpha 7$ -nAChR signalling. A possible  $\alpha 7$ -nAChR down-stream mechanism may be the induction of phospho-Akt and phospho-p44/42 MAPK. This mechanism was hypothesised, partially, by OLDS and KABBANI [10] on their schematic model explaining how nicotine exposure increases the risk of SARS-CoV-2 entry into lung cells.  $\alpha 7$ -nAChR is present both in neuronal and non-neuronal cells (*i.e.* lung, endothelial, lymphocyte); consequently, smoking may impact COVID-19 pathophysiology and clinical outcome in several organ systems, including the brain.
